# Supplementary material
Source: publisher figshare collection journal article supplement (https://acs.figshare.com/ndownloader/files/5138287)
Supplement: Supplementary file 1 [file 5138287]

**Supporting Information for**  
**Excited State Mixed Valence in a Diphenyl Hydrazine Cation:**  
**Spectroscopic Consequences of Coupling and Transition Dipole**  
**Moment Orientation**

*Jenny V. Lockard and Jeffrey I. Zink\**

*Dwight A. Trieber II, Asgeir E. Konradsson, Michael N. Weaver, and Stephen F. Nelsen\**

Crystallographic parameters can be found in the accompanying cif files.

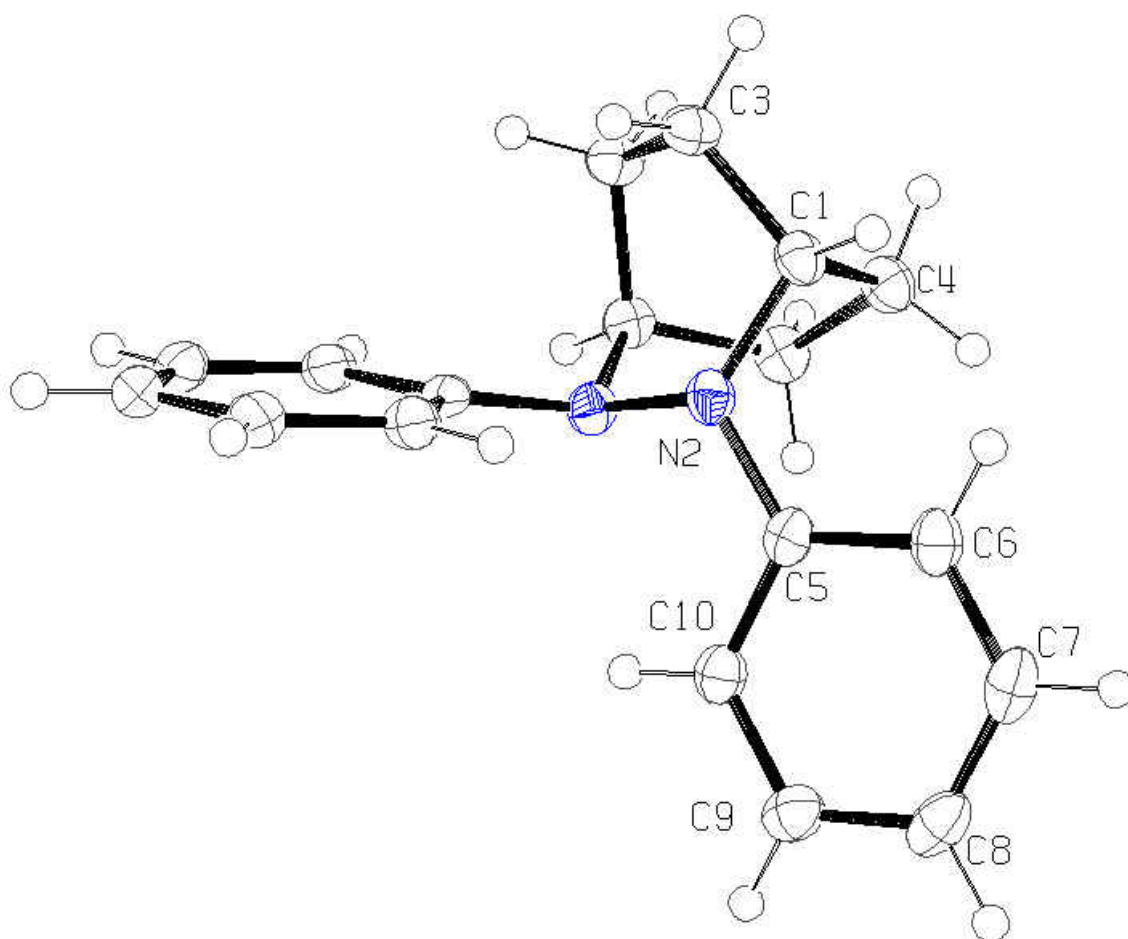

Figure S1. X-ray structure of **1** (**22/Ph<sub>2</sub>**). Thermal ellipsoids drawn at 50 % probability.

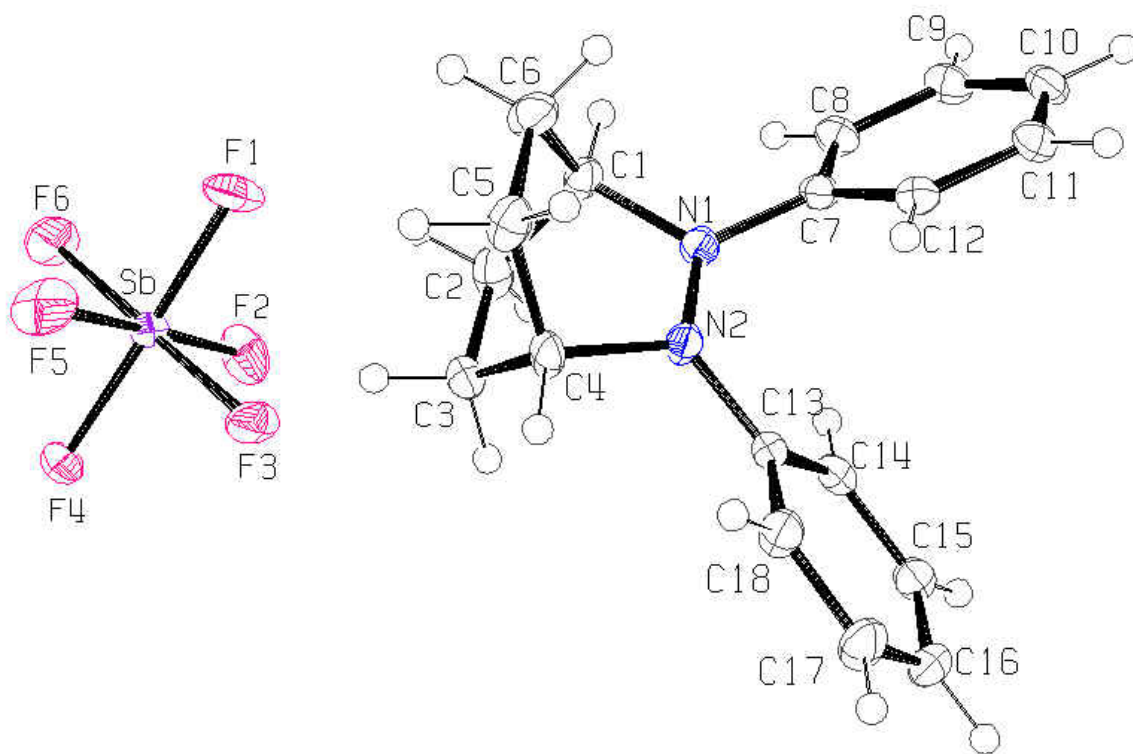

Figure S2. X-ray structure of  $\mathbf{1}^+$  ( $\text{SbF}_6^-$ ). Thermal ellipsoids drawn at Thermal ellipsoids drawn at 50 % probability.
